# Supplementary material
Source: PubMed Central journal article supplement (PMC6814302)
Supplement: NIHMS1049771-supplement-Supplemental_Material.pdf [file NIHMS1049771-supplement-Supplemental_Material.pdf]

### Supplementary Materials (Online Only)

#### Tier 2 Confirmatory Analyses: Mechanisms Associated with Sluggish Cognitive Tempo

##### Alertness Deficits, Working Memory Slips, and Sleepy/Tired Symptoms

We repeated the Tier 1 analyses, separately for the K-SCT alertness, working memory slips, and sleepy/tired subscales. Reporting is condensed for readability and summarized in Table S1.

##### Sluggish cognitive tempo alertness deficits

*Parent-reported alertness deficits.* The best fitting final model included faster inhibition speed ( $B = -0.68$ ) and slower working memory speed ( $B = 1.06$ ) as predictors of higher parent-reported alertness deficits ( $BF_{10} = 73.49$ ;  $R^2 = .12$ ). There was significant evidence *against* effects of drift rate ( $BF_{01} = 5.38$ ), response caution ( $BF_{01} = 5.25$ ), and non-decision time ( $BF_{01} = 4.40$ ); the evidence against shifting speed was inconclusive ( $BF_{01} = 1.35$ ).

*Teacher-reported alertness deficits.* The best fitting final model included slower working memory manipulation speed only ( $B = 1.07$ ) ( $BF_{10} = 3.06$ ;  $R^2 = .05$ ). There was significant evidence *against* effects of drift rate ( $BF_{01} = 4.24$ ), non-decision time ( $BF_{01} = 3.28$ ), inhibition speed ( $BF_{01} = 3.78$ ) and shifting speed ( $BF_{01} = 3.99$ ); there was insufficient evidence to rule out effects of response caution ( $BF_{01} = 2.02$ ).

##### Sluggish cognitive tempo working memory slips

*Parent-reported working memory slips.* The best fitting final model included lower SES ( $B = -0.05$ ) and slower working memory speed ( $B = 0.52$ ) as predictors of higher parent-reported working memory slips ( $BF_{10} = 7.74$ ;  $R^2 = .08$ ). There was significant evidence *against* effects of drift rate ( $BF_{01} = 3.40$ ), non-decision time ( $BF_{01} = 3.99$ ), and shifting speed ( $BF_{01} = 8.72$ ); there was insufficient evidence to rule out effects of response caution ( $BF_{01} = 2.84$ ) and inhibition speed ( $BF_{01} = 2.91$ ).

*Teacher-reported working memory slips.* The best fitting final model included slower working

memory manipulation speed ( $B = 0.68$ ) and inhibition speed ( $B = 0.93$ ) as predictors of higher teacher-reported working memory slips ( $BF_{10} = 29.13$ ;  $R^2 = .10$ ). There was significant evidence *against* effects of drift rate ( $BF_{01} = 3.72$ ), non-decision time ( $BF_{01} = 4.15$ ), and shifting speed ( $BF_{01} = 3.46$ ); there was insufficient evidence to rule out an effect of response caution ( $BF_{01} = 1.70$ ).

### **Sluggish cognitive tempo sleepy/tired symptoms**

*Parent-reported sleepy/tired symptoms.* The best fitting final model included faster inhibition speed ( $B = -0.35$ ) as the only predictor of higher parent-reported sleepy/tired symptoms, but support for this model failed to reach prespecified evidence thresholds ( $BF_{10} = 2.15$ ;  $R^2 = .04$ ). There was significant evidence *against* effects of drift rate ( $BF_{01} = 3.42$ ), non-decision time ( $BF_{01} = 4.08$ ), and working memory speed ( $BF_{01} = 3.86$ ); there was insufficient evidence to rule out effects of response caution ( $BF_{01} = 2.12$ ) and shifting speed ( $BF_{01} = 1.94$ ).

*Teacher-reported sleepy/tired symptoms.* The best fitting final model included slower working memory manipulation speed ( $B = 0.41$ ) as the only predictor of higher teacher-reported sleepy/tired symptoms, but support this model failed to reach prespecified evidence thresholds ( $BF_{10} = 2.88$ ;  $R^2 = .05$ ). There was significant evidence *against* effects of non-decision time ( $BF_{01} = 4.28$ ), inhibition speed ( $BF_{01} = 3.81$ ), and shifting speed ( $BF_{01} = 3.68$ ); there was insufficient evidence to rule out effects of response caution ( $BF_{01} = 1.39$ ) and drift rate ( $BF_{01} = 1.72$ ).

Table S1. Exploratory analyses for sluggish cognitive tempo subscales

|                                    | Higher <i>parent</i> -reported sluggish cognitive tempo (SCT) symptoms associated with: |                                      |                                      | Higher <i>teacher</i> -reported sluggish cognitive tempo (SCT) symptoms associated with: |                                                   |                                      |
|------------------------------------|-----------------------------------------------------------------------------------------|--------------------------------------|--------------------------------------|------------------------------------------------------------------------------------------|---------------------------------------------------|--------------------------------------|
|                                    | Alertness                                                                               | WM Slips                             | Sleepy/Tired                         | Alertness                                                                                | WM Slips                                          | Sleepy/Tired                         |
| <i>Demographics</i>                |                                                                                         |                                      |                                      |                                                                                          |                                                   |                                      |
| Age                                | <b>Evidence Against</b>                                                                 | <i>Evidence Against</i>              | <i>Inconclusive Evidence Against</i> | <b>Evidence Against</b>                                                                  | <i>Inconclusive Evidence Against</i>              | <i>Inconclusive Evidence Against</i> |
| Gender                             | <b>Evidence Against</b>                                                                 | <b>Evidence Against</b>              | <i>Inconclusive Evidence Against</i> | <b>Evidence Against</b>                                                                  | <b>Evidence Against</b>                           | <i>Evidence Against</i>              |
| SES                                | <i>Inconclusive Support For</i>                                                         | <u>Lower</u>                         | <i>Evidence Against</i>              | <i>Evidence Against</i>                                                                  | <i>Evidence Against</i>                           | <i>Inconclusive Evidence Against</i> |
| <i>Processing Speed</i>            |                                                                                         |                                      |                                      |                                                                                          |                                                   |                                      |
| Drift rate ( $\nu$ )               | <b>Evidence Against</b>                                                                 | <b>Evidence Against</b>              | <i>Evidence Against</i>              | <b>Evidence Against</b>                                                                  | <b>Evidence Against</b>                           | <i>Inconclusive Evidence Against</i> |
| Response caution ( $a$ )           | <i>Evidence Against</i>                                                                 | <i>Inconclusive Evidence Against</i> | <i>Inconclusive Evidence Against</i> | <i>Inconclusive Evidence Against</i>                                                     | <i>Inconclusive Evidence Against</i> <sup>2</sup> | <i>Inconclusive Evidence Against</i> |
| Nondecision time ( $t_0$ )         | <b>Evidence Against</b>                                                                 | <b>Evidence Against</b>              | <b>Evidence Against</b>              | <b>Evidence Against</b>                                                                  | <b>Evidence Against</b>                           | <b>Evidence Against</b>              |
| <i>Executive Functioning Speed</i> |                                                                                         |                                      |                                      |                                                                                          |                                                   |                                      |
| Inhibitory control                 | <u>Faster</u>                                                                           | <i>Inconclusive Evidence Against</i> | <i>Inconclusive Support For</i>      | <i>Evidence Against</i>                                                                  | <u>Slower</u>                                     | <i>Evidence Against</i>              |
| WM manipulation                    | <b>Slower</b>                                                                           | <b>Slower</b> <sup>1</sup>           | <i>Evidence Against</i>              | <b>Slower</b> <sup>1</sup>                                                               | <b>Slower</b>                                     | <i>Inconclusive Support For</i>      |
| Set shifting                       | <i>Inconclusive Evidence Against</i>                                                    | <b>Evidence Against</b>              | <i>Inconclusive Evidence Against</i> | <i>Evidence Against</i>                                                                  | <b>Evidence Against</b>                           | <i>Evidence Against</i>              |

Note: Descriptors (higher, lower, faster, slower) for significant predictors ( $BF_{10} \geq 3$ ) are underlined and based on interpretation of B-weight direction to indicate correspondence with higher levels of sluggish cognitive tempo (SCT) symptoms. B-weights are conceptually 0.00 for predictors showing significant support for the null hypothesis of no effect. **Bolded** cells indicate findings with significant support ( $BF_{10}$  or  $BF_{01} \geq 3$ ) that are consistent across parent and teacher models. *Italicized* cells may also be consistent across models, with both models showing evidence in the same direction but at least one failing to reach preset significance thresholds. WM = working memory.

<sup>1</sup> Significant effect that did not survive control for the overlap between sluggish cognitive tempo symptoms and cross-informant ADHD-Inattentive symptoms. <sup>2</sup> Significant support for response caution ( $BF_{10} = 11.83$ ) prior to adding executive function speed to the model.
